# Supplementary material for: Carnauba wax-based sustainable coatings for prolonging postharvest shelf-life of citrus fruits
Source: Royal Society of Chemistry journal article supplement (doi:10.1039/d2fb00049k), 2023-01-01
Supplement: d2fb00049k1.pdf [file d2fb00049k1.pdf]

## **Supplementary materials**

### **Carnauba wax-based sustainable coatings for prolonging postharvest shelf-life of citrus fruits**

**L. Susmita Devi,<sup>a</sup> Avik Mukherjee<sup>\*a</sup>, Debjani Dutta<sup>b</sup>, Santosh Kumar<sup>\*a</sup>**

*<sup>a</sup>Department of Food Engineering and Technology, Central Institute of Technology Kokrajhar, Kokrajhar, BTR, Assam-783370, India*

*<sup>b</sup>Department of Biotechnology, National Institute of Technology Durgapur, Mahatma Gandhi Avenue, Durgapur 713209*

#### **\*Corresponding authors**

Santosh Kumar; email: [s.kumar@cit.ac.in](mailto:s.kumar@cit.ac.in)

Avik Mukherjee: [ak.mukherjee@cit.ac.in](mailto:ak.mukherjee@cit.ac.in)

**Table S1.** Effects of coating formulations on TSS, TA, TSS/TA, firmness, and pH of the treated citrus fruits stored at ambient condition for 28 days

| Fruit          | Day    | Treatments               | TSS (%)    | TA (%)    | TSS/TA (%) | Firmness (N) | pH        |
|----------------|--------|--------------------------|------------|-----------|------------|--------------|-----------|
| Khasi mandarin | Day-0  | Both coated and uncoated | 12.16±0.28 | 0.88±0.04 | 13.82±0.56 | 21.52±0.67   | 3.80±0.4  |
|                | Day-28 | Uncoated                 | 11.16±0.16 | 0.45±0.03 | 24.8±2.26  | 4.49±0.01    | 4.32±0.02 |
|                |        | CW                       | 13.01±0.28 | 0.56±0.04 | 23.21±2.56 | 4.61±0.1     | 4.19±0.07 |
|                |        | CW/NONE-5                | 12.16±0.16 | 0.54±0.04 | 22.51±1.33 | 12.28±0.09   | 4.25±0.25 |
|                |        | CW/NONE-10               | 14.02±0.16 | 0.60±0.05 | 23.33±2.95 | 12.28±0.14   | 4.09±0.01 |
| Sweet lemon    | Day-0  | Both coated and uncoated | 8.01±0.51  | 0.98±0.05 | 8.16±0.08  | 45.89±2.27   | 3.79±0.2  |
|                | Day-28 | Uncoated                 | 8.84±0.16  | 0.73±0.02 | 12.10±0.3  | 18.32±0.06   | 4.05±0.02 |
|                |        | CW                       | 8.50±0.28  | 0.77±0.01 | 11.03±0.23 | 25.15±0.04   | 3.91±0.03 |
|                |        | CW/NONE-5                | 8.67±0.33a | 0.78±0.03 | 11.11±0.91 | 25.05±0.09   | 3.84±0.02 |
|                |        | CW/NONE-10               | 8.17±0.33a | 0.81±0.01 | 10.08±0.4  | 24.30±0.04   | 3.85±0.02 |

The values are expressed as means±SD of triplicate assays, and the superscript with the values indicate they are significantly different by LSD at  $p < 0.05$ .
